# Supplementary material for: Continuous-Wave Pumped Monolayer WS2 Lasing for Photonic Barcoding
Source: MDPI journal article supplement (doi:10.3390/nano14070614), 2024-03-30
Supplement: s1 [file s1]

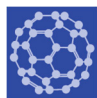

## Article

# Continuous-Wave Pumped Monolayer WS<sub>2</sub> Lasing for Photonic Barcoding

Haodong Cheng <sup>1,2,3</sup>, Junyu Qu <sup>1,2</sup>, Wangqi Mao <sup>3,\*</sup>, Shula Chen <sup>1,2,\*</sup> and Hongxing Dong <sup>3,4,\*</sup>

<sup>1</sup> Key Laboratory for Micro-Nano Physics and Technology of Hunan Province, College of Materials Science and Engineering, Hunan University, Changsha, Hunan 410082, P.R. China; shuch@hnu.edu.cn (S.C.); haodongc@hnu.edu.cn (H.C.); qujunyu@hnu.edu.cn (J.Q.)

<sup>2</sup> Hunan Institute of Optoelectronic Integration, Hunan University, Changsha, 410082, China

<sup>3</sup> Key Laboratory of Materials for High-Power Laser, Shanghai Institute of Optics and Fine Mechanics, Chinese Academy of Sciences, Shanghai 201800, China; hongxingd@siom.ac.cn (H.D.); mwangqi@mail.ustc.edu.cn (W.M.)

<sup>4</sup> Hangzhou Institute for Advanced Study, Chinese Academy of Sciences, Hangzhou 310024, China

\* Correspondence: [hongxingd@siom.ac.cn](mailto:hongxingd@siom.ac.cn); [shuch@hnu.edu.cn](mailto:shuch@hnu.edu.cn); [mwangqi@mail.ustc.edu.cn](mailto:mwangqi@mail.ustc.edu.cn)

**Supplementary Information for**

**Continuous-Wave Pumped Monolayer WS<sub>2</sub> Lasing for Photonic Barcoding**

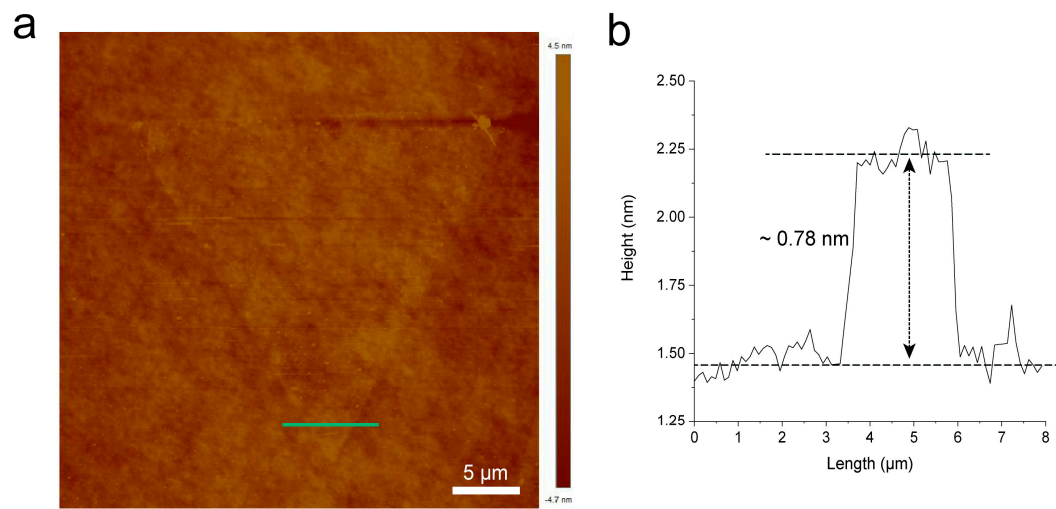

**Figure S1.** (a) AFM image of a monolayer CVD-grown WS<sub>2</sub>. (b) The height profile curve along the solid green line in (a). The thickness of as-grown monolayer WS<sub>2</sub> is about 0.78 nm.

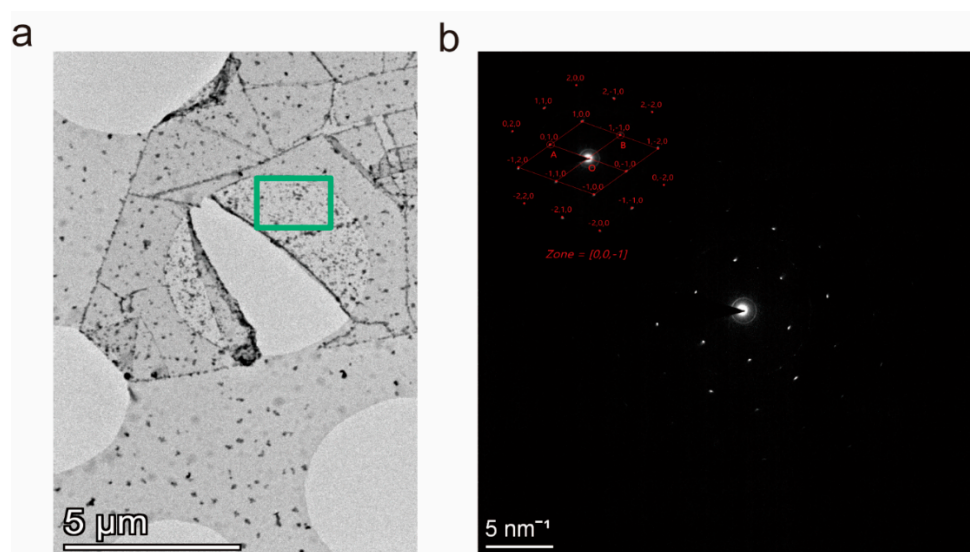

**Figure S2.** (a) A low-magnification TEM image of the triangular WS<sub>2</sub> monolayer transferred onto Cu grids. (b) SAED pattern of the WS<sub>2</sub> at the location of the green box in (a). Inset: calibration of the SAED pattern.

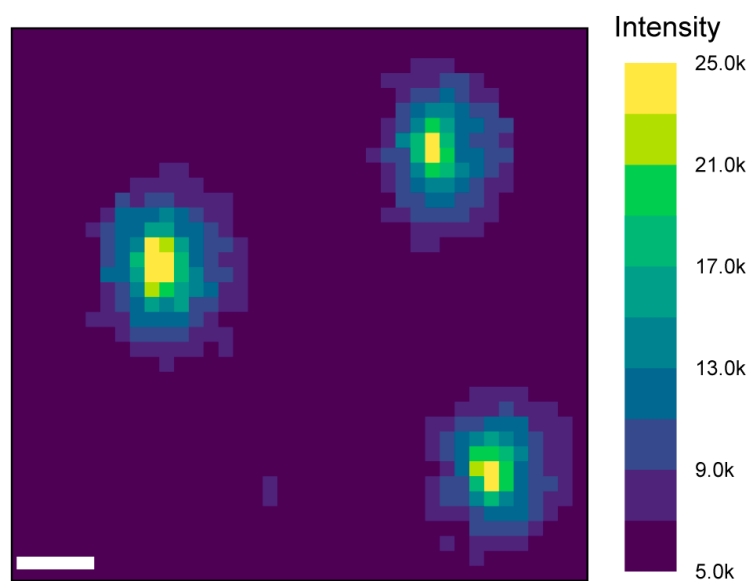

**Figure S3.** PL mapping image of CVD-grown WS<sub>2</sub> with the external cavities by plotting intensity at 620 nm when the pumping power was 500 W cm<sup>-2</sup>. Scale bar is 10 μm.

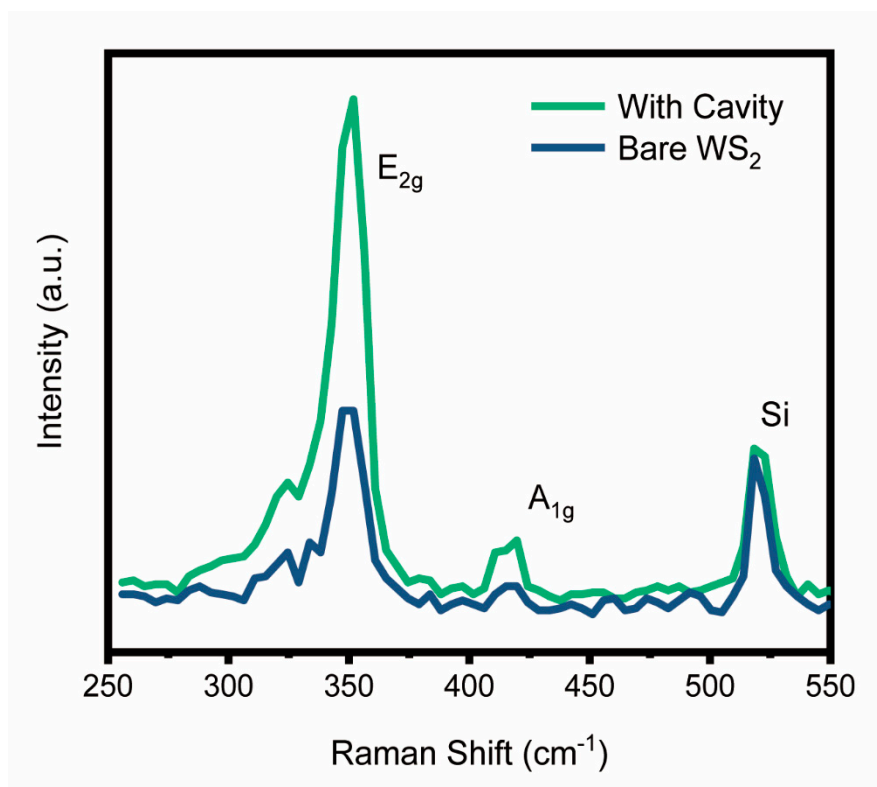

**Figure S4.** Raman spectra of monolayer WS<sub>2</sub> and WS<sub>2</sub> coupled with the resonant cavity. The difference in wavenumber between E<sub>2g</sub> and A<sub>1g</sub> characteristic modes is 62.5 cm<sup>-1</sup>, which confirms that the CVD-grown WS<sub>2</sub> films are monolayer. The vigorous intensity of Si at 520 cm<sup>-1</sup> is another evidence of synthesized ultra-thin WS<sub>2</sub>.

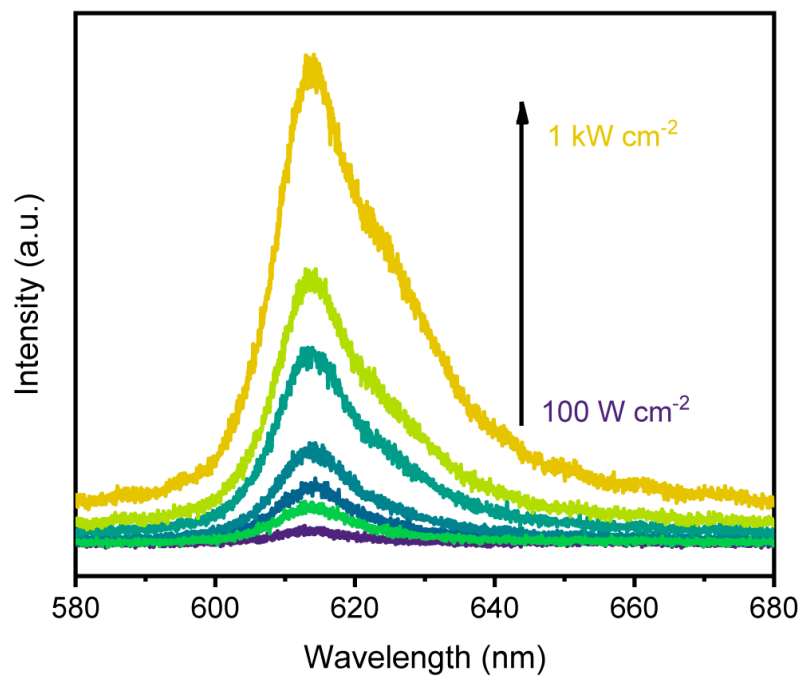

**Figure S5.** PL spectra of bare WS<sub>2</sub> at different excitation powers. The excitation power is 100 W cm<sup>-2</sup>, 200 W cm<sup>-2</sup>, 300 W cm<sup>-2</sup>, 400 W cm<sup>-2</sup>, 600 W cm<sup>-2</sup>, 700 W cm<sup>-2</sup>, and 1 kW cm<sup>-2</sup> in order from low to high.
